# Supplementary material
Source: Springer Nature journal article supplement (https://www.springermedizin.de/resource/supplementary/12986_2012_455_MOESM2_ESM.pdf/25656122)
Supplement: MOESM2 [file 25656122]

**Supplementary Table 2.** Amino acid profiles of the whey and soy protein drinks

| Amino Acid (g) | <b>0 g</b><br><b>(n = 10)</b> | <b>W20</b><br><b>(n = 10)</b> | <b>W40</b><br><b>(n = 10)</b> | <b>S20</b><br><b>(n = 10)</b> | <b>S40</b><br><b>(n = 10)</b> |
|----------------|-------------------------------|-------------------------------|-------------------------------|-------------------------------|-------------------------------|
| Isoleucine     | -                             | 1.4                           | 2.8                           | 1.0                           | 2.0                           |
| Leucine        | -                             | 2.0                           | 4.0                           | 1.6                           | 3.2                           |
| Lysine         | -                             | 1.8                           | 3.6                           | 1.3                           | 2.6                           |
| Methionine     | -                             | 0.4                           | 0.8                           | 0.3                           | 0.6                           |
| Threonine      | -                             | 1.4                           | 2.8                           | 0.7                           | 1.4                           |
| Phenylalanine  | -                             | 0.6                           | 1.2                           | 1.0                           | 2.0                           |
| Tryptophan     | -                             | 0.4                           | 0.8                           | 0.2                           | 0.4                           |
| Valine         | -                             | 1.2                           | 2.4                           | 1.0                           | 2.0                           |
| Histidine      | -                             | 0.4                           | 0.8                           | 0.5                           | 1.0                           |
| Alanine        | -                             | 1.0                           | 2.0                           | 0.9                           | 1.8                           |
| Arginine       | -                             | 0.4                           | 0.8                           | 1.5                           | 3.0                           |
| Aspartic acid  | -                             | 2.2                           | 4.4                           | 2.3                           | 4.6                           |
| Cystine        | -                             | 0.4                           | 0.8                           | 0.2                           | 0.4                           |
| Glutamic acid  | -                             | 3.4                           | 6.8                           | 3.8                           | 7.6                           |
| Glycine        | -                             | 0.4                           | 0.8                           | 0.8                           | 1.6                           |
| Proline        | -                             | 1.2                           | 2.4                           | 1.0                           | 2.0                           |
| Serine         | -                             | 0.8                           | 1.6                           | 1.1                           | 2.2                           |
| Tyrosine       | -                             | 0.6                           | 1.2                           | 0.8                           | 1.6                           |
| Total EAA      | -                             | 9.2                           | 18.4                          | 7.1                           | 14.2                          |
| Total BCAA     | -                             | 5.2                           | 10.4                          | 3.9                           | 7.8                           |
| Total AA       | -                             | 20.0                          | 40.0                          | 20.0                          | 40                            |
